# Supplementary material for: Diterpenoids from the Endophytic Fungus Botryosphaeria sp. P483 of the Chinese Herbal Medicine Huperzia serrata
Source: MDPI journal article supplement (doi:10.3390/molecules200916924), 2015-09-17
Supplement: s1 [file s1]

## Supplementary Information

**Figures S1–S6** The  $^1\text{H}$ -,  $^{13}\text{C}$ -NMR, HSQC, HMBC, COSY and ROESY of botryosphaerin G in  $\text{CHCl}_3$ .

**Figures S7–S12** The  $^1\text{H}$ -,  $^{13}\text{C}$ -NMR, HSQC, HMBC, COSY and ROESY of botryosphaerin H in  $\text{C}_5\text{D}_5\text{N}$ .

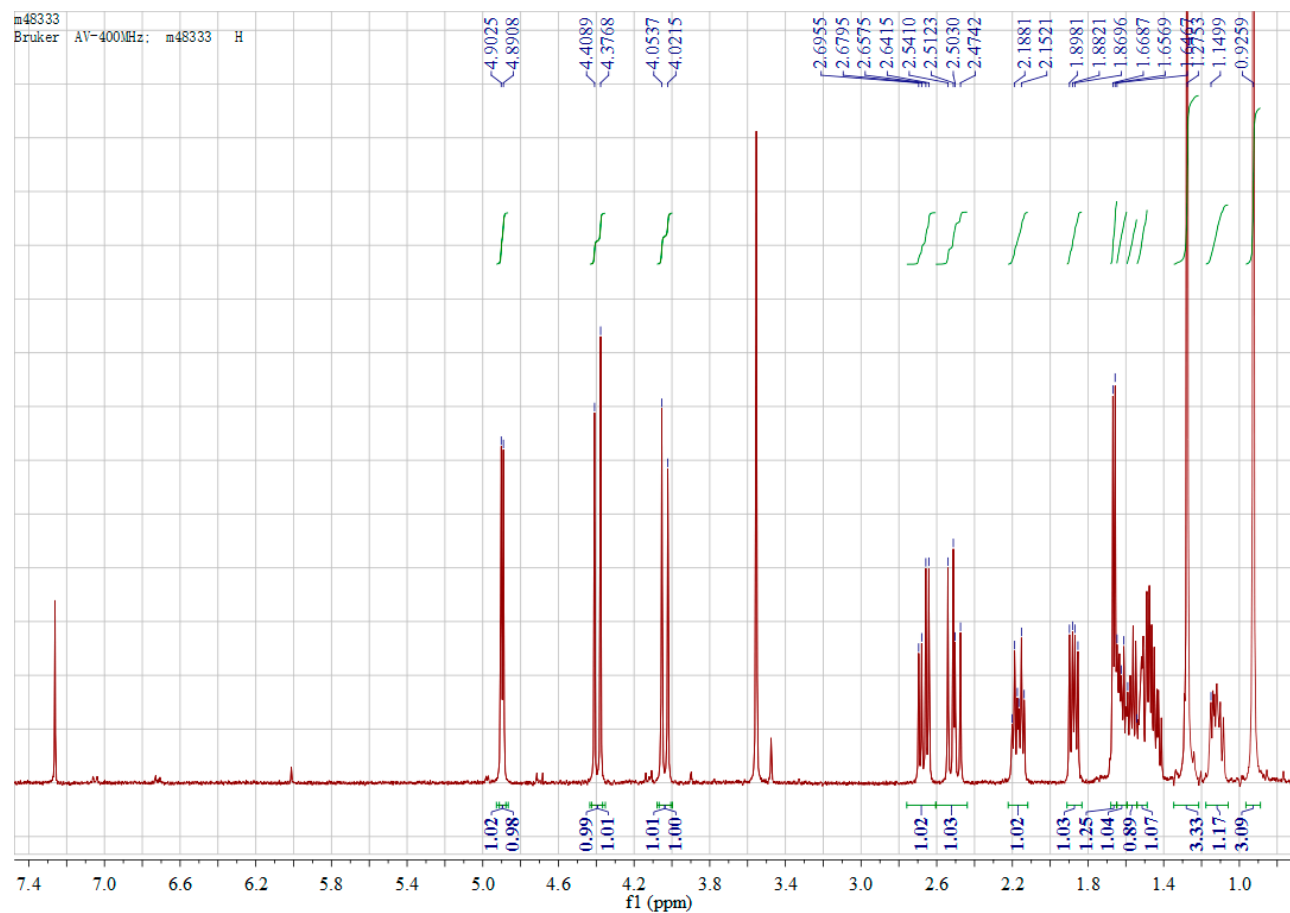

**Figure S1.** The  $^1\text{H}$ -NMR of botryosphaerin G in  $\text{CHCl}_3$ .

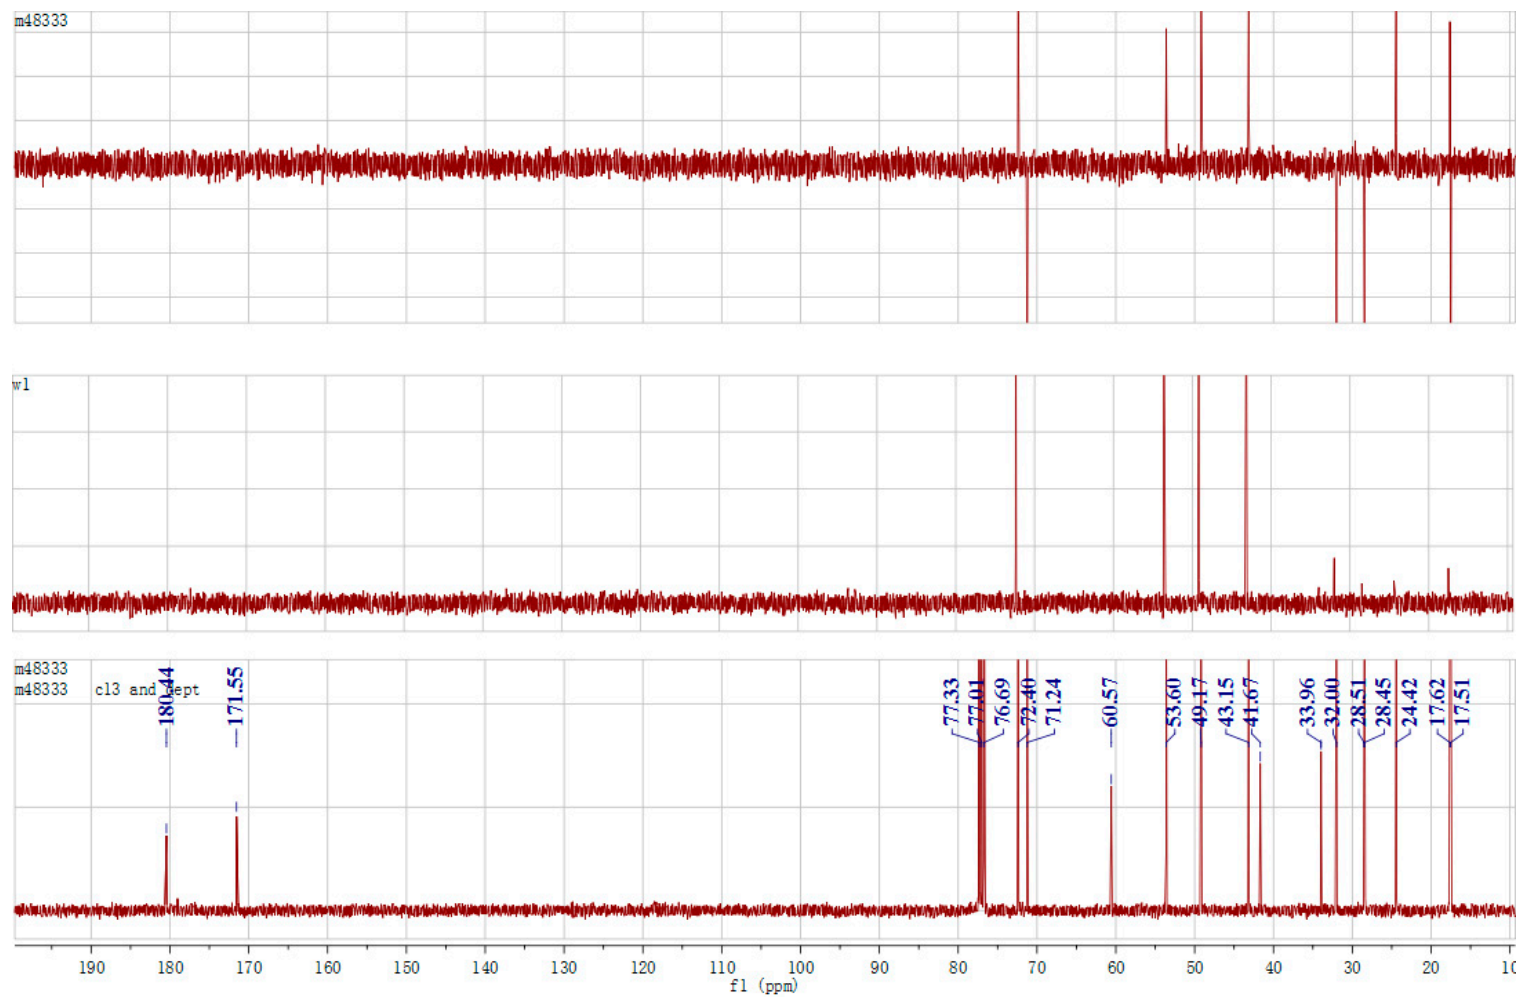

**Figure S2.** The  $^{13}\text{C}$ -NMR of botryosphaerin G in  $\text{CHCl}_3$ .

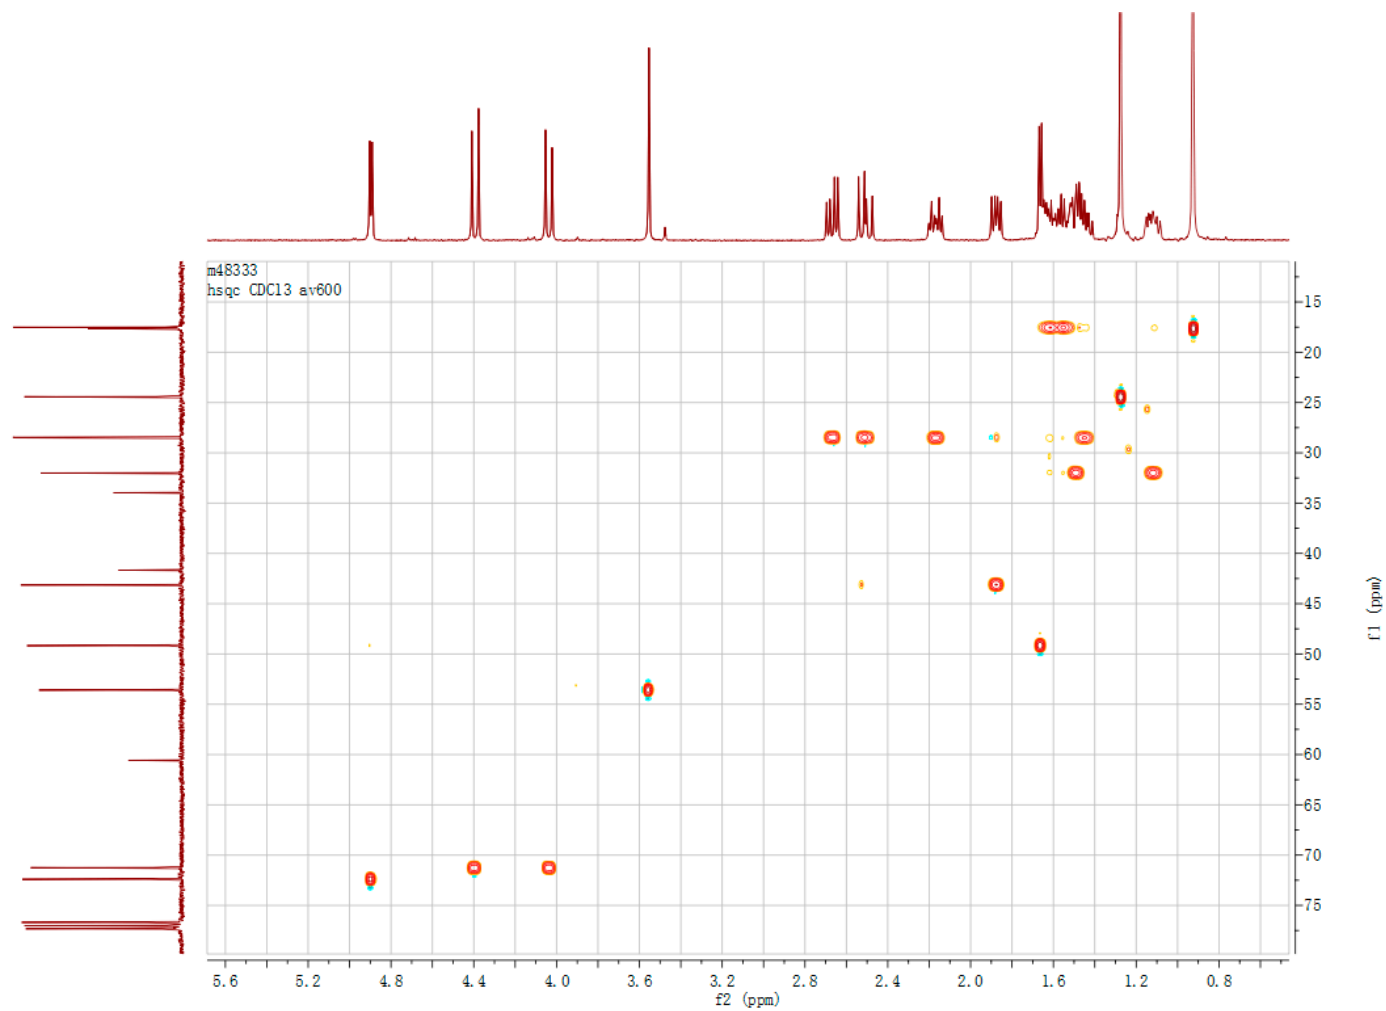

**Figure S3.** The HSQC NMR of botryosphaerin G in  $\text{CHCl}_3$ .

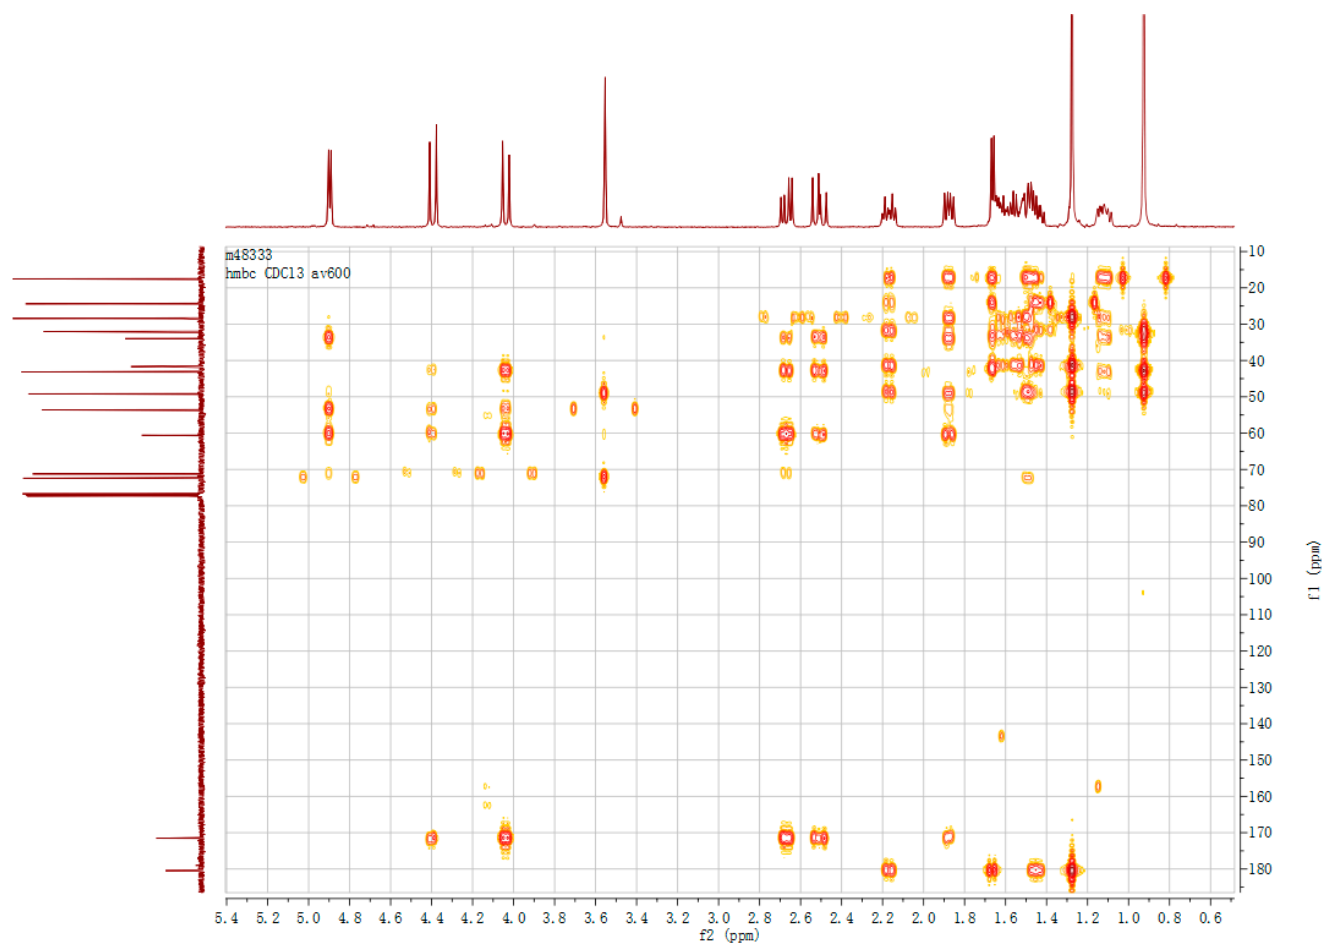

**Figure S4.** The HMBC NMR of botryosphaerin G in  $\text{CHCl}_3$ .

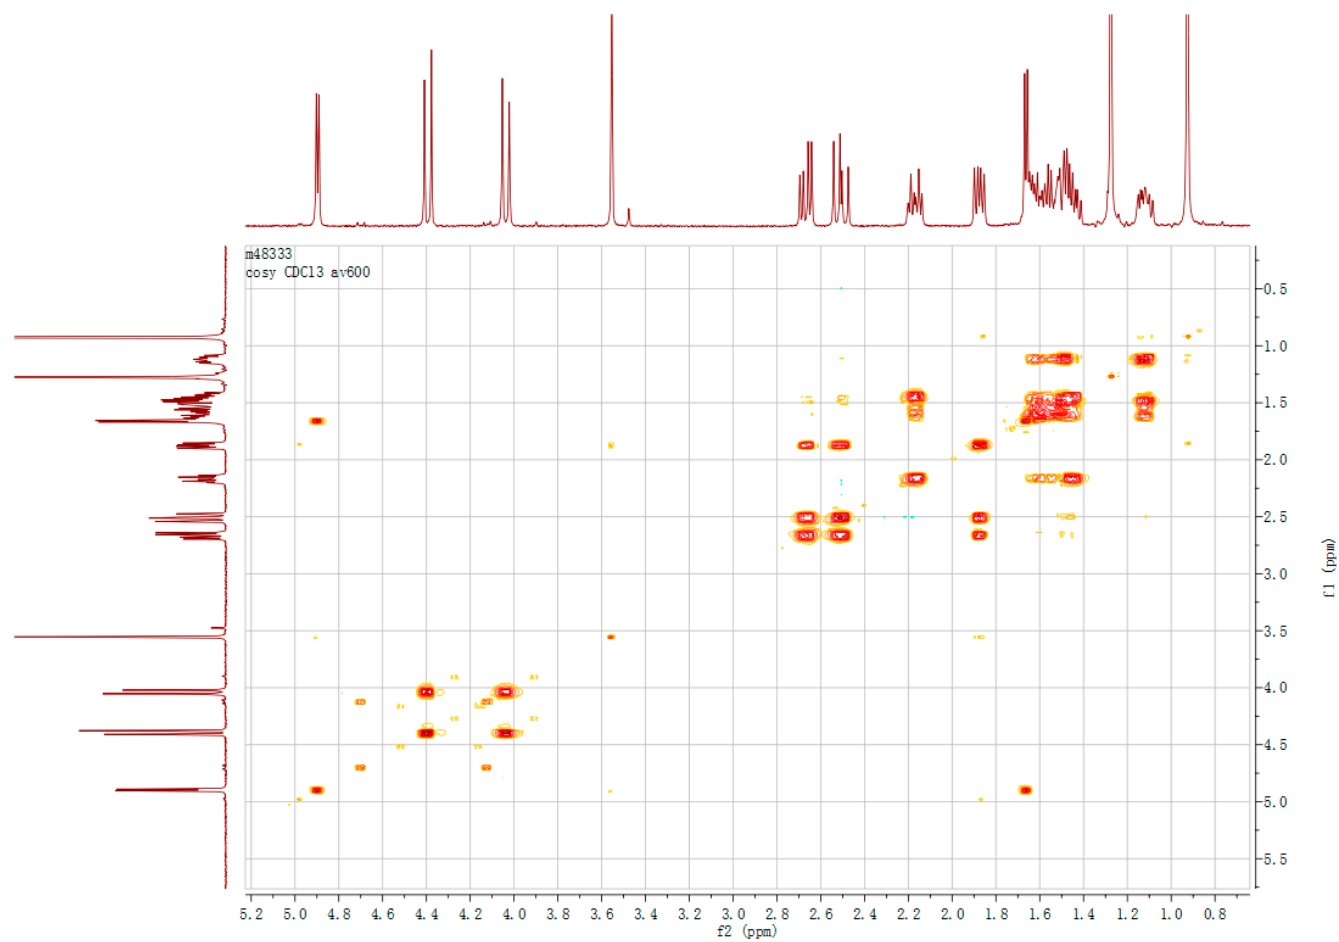

**Figure S5.** The COSY NMR of botryosphaerin G in  $\text{CHCl}_3$ .

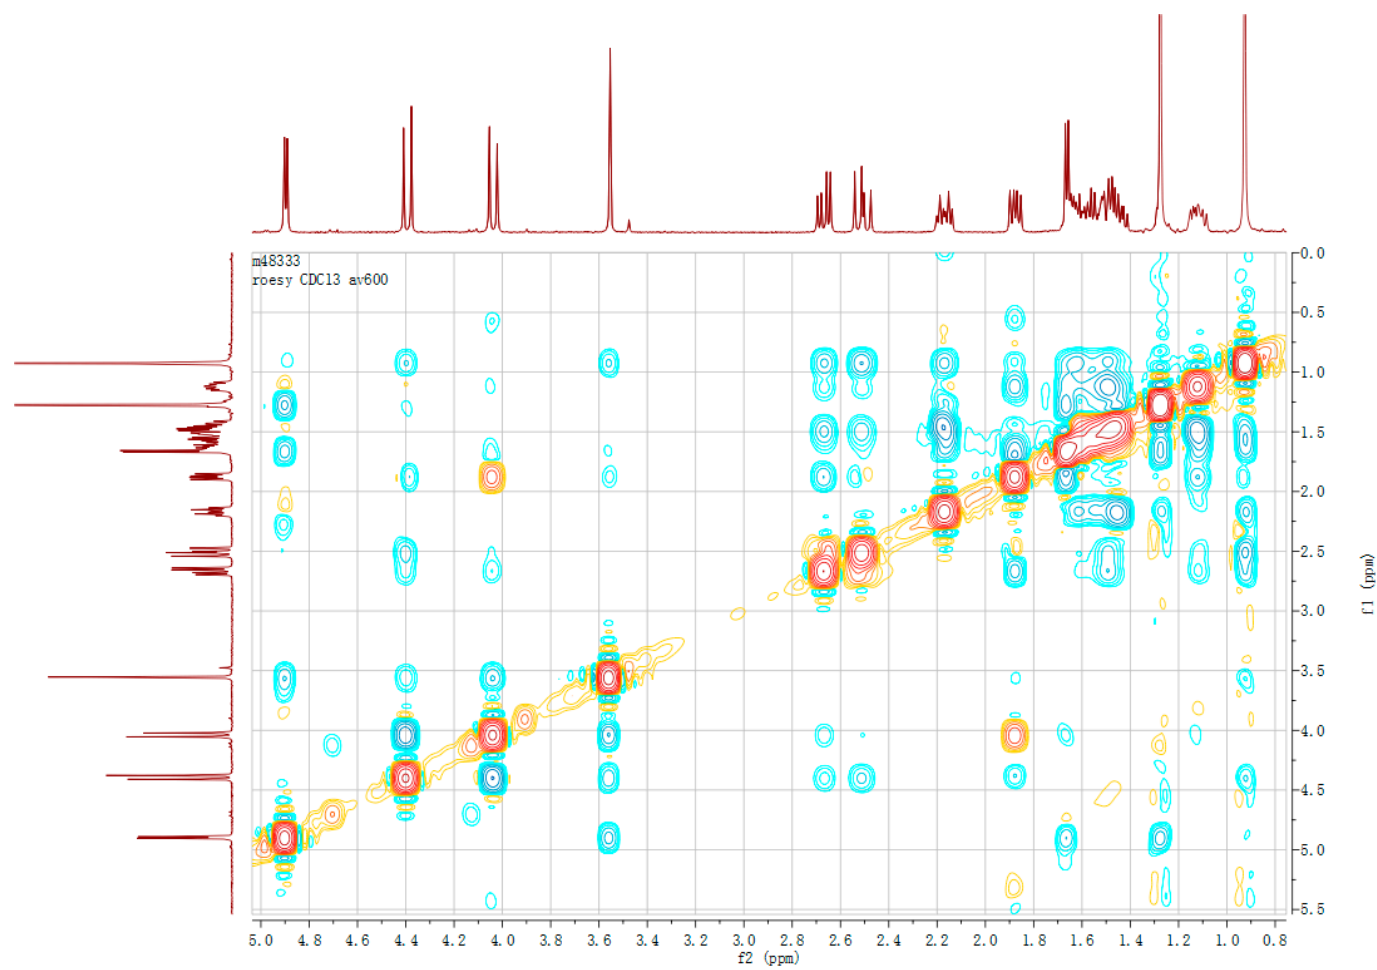

**Figure S6.** The ROESY NMR of botryosphaerin G in  $\text{CHCl}_3$ .

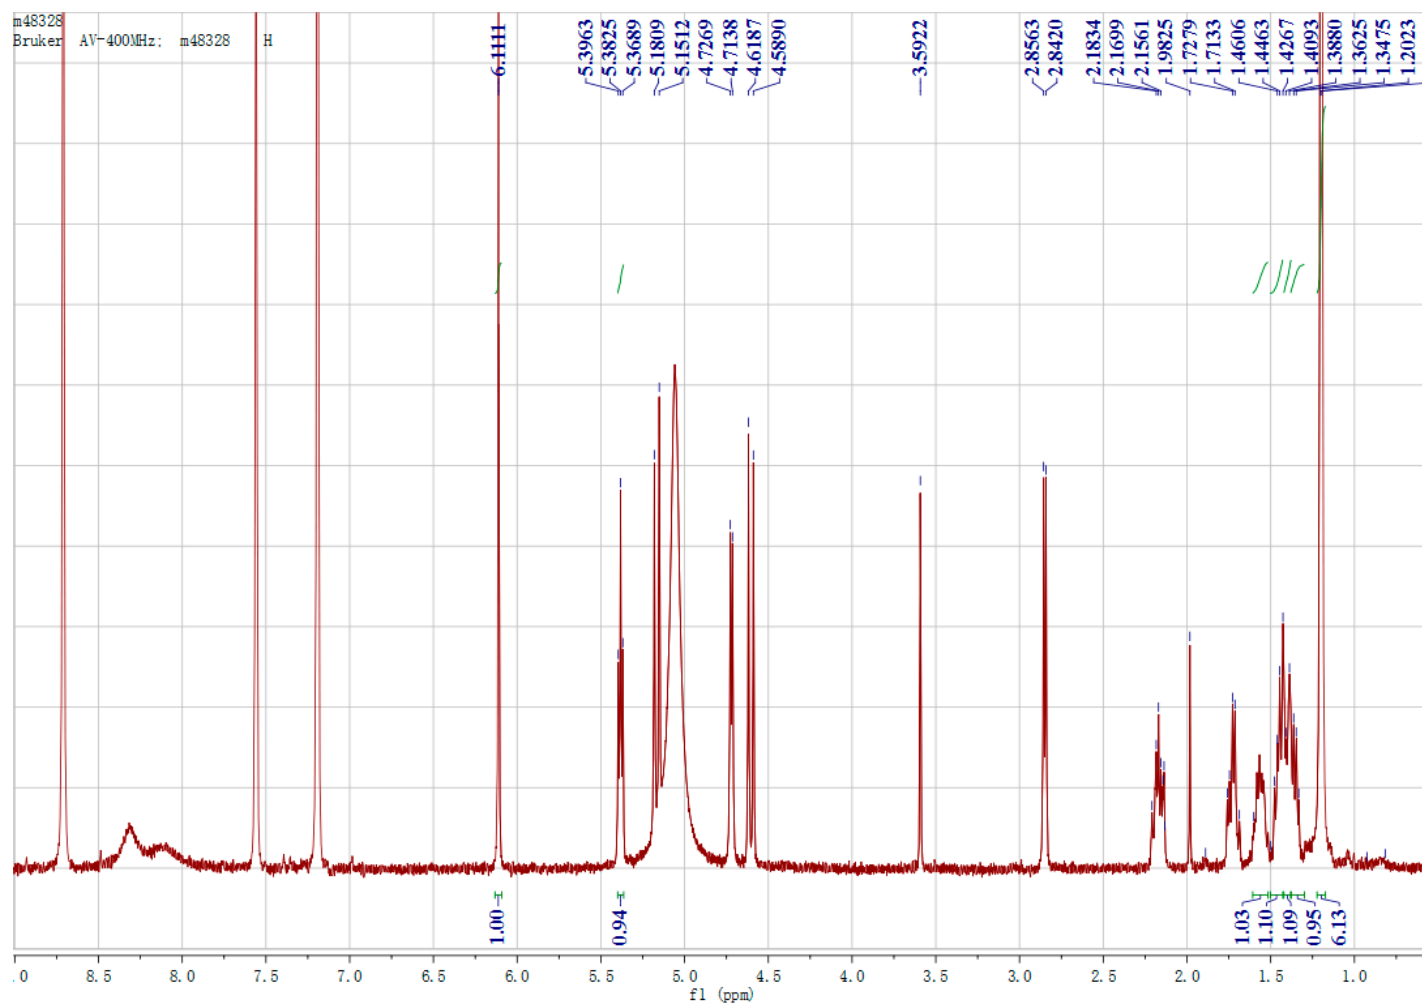

**Figure S7.** The <sup>1</sup>H-NMR of botryosphaerin H in C<sub>5</sub>D<sub>5</sub>N.

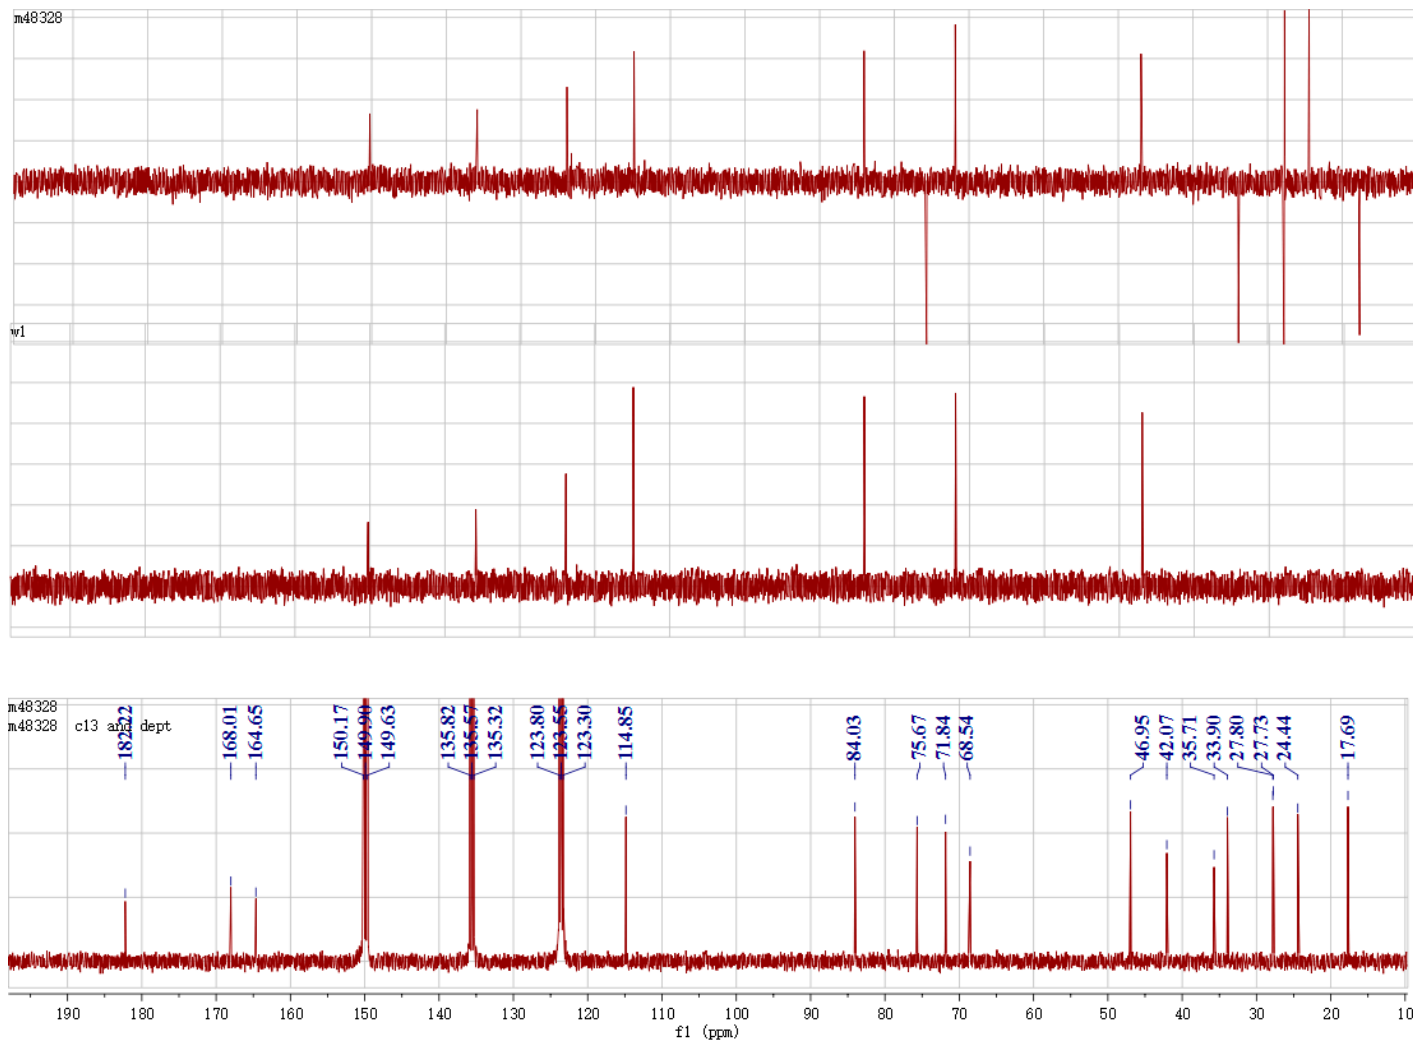

**Figure S8.** The  $^{13}\text{C}$ -NMR of botryosphaerin H in  $\text{C}_5\text{D}_5\text{N}$ .



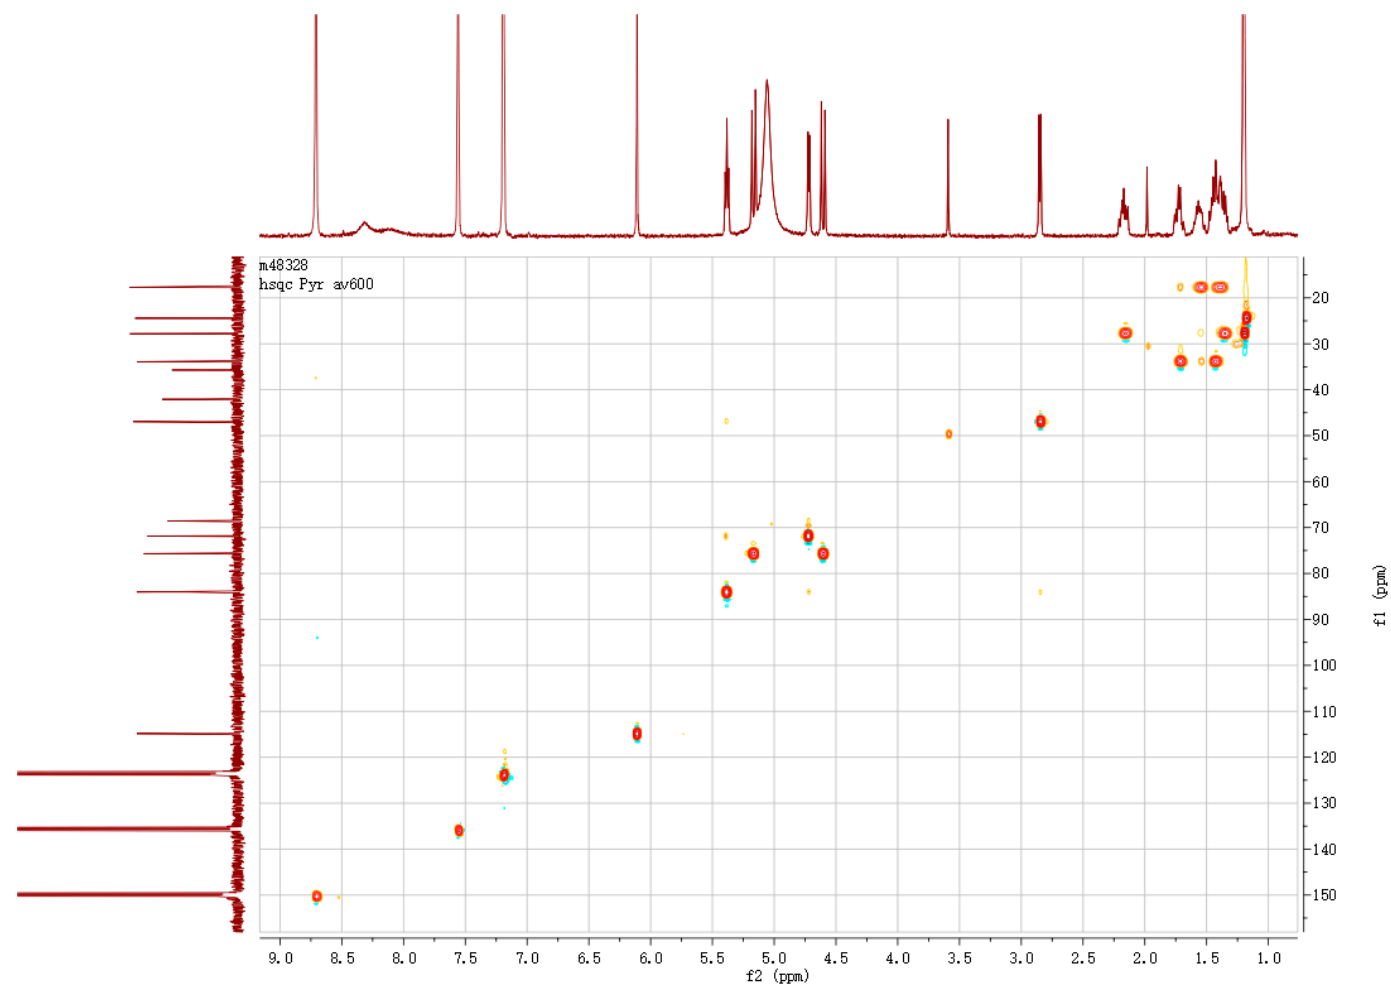

**Figure S9.** The HSQC NMR of botryosphaerin H in  $C_5D_5N$ .

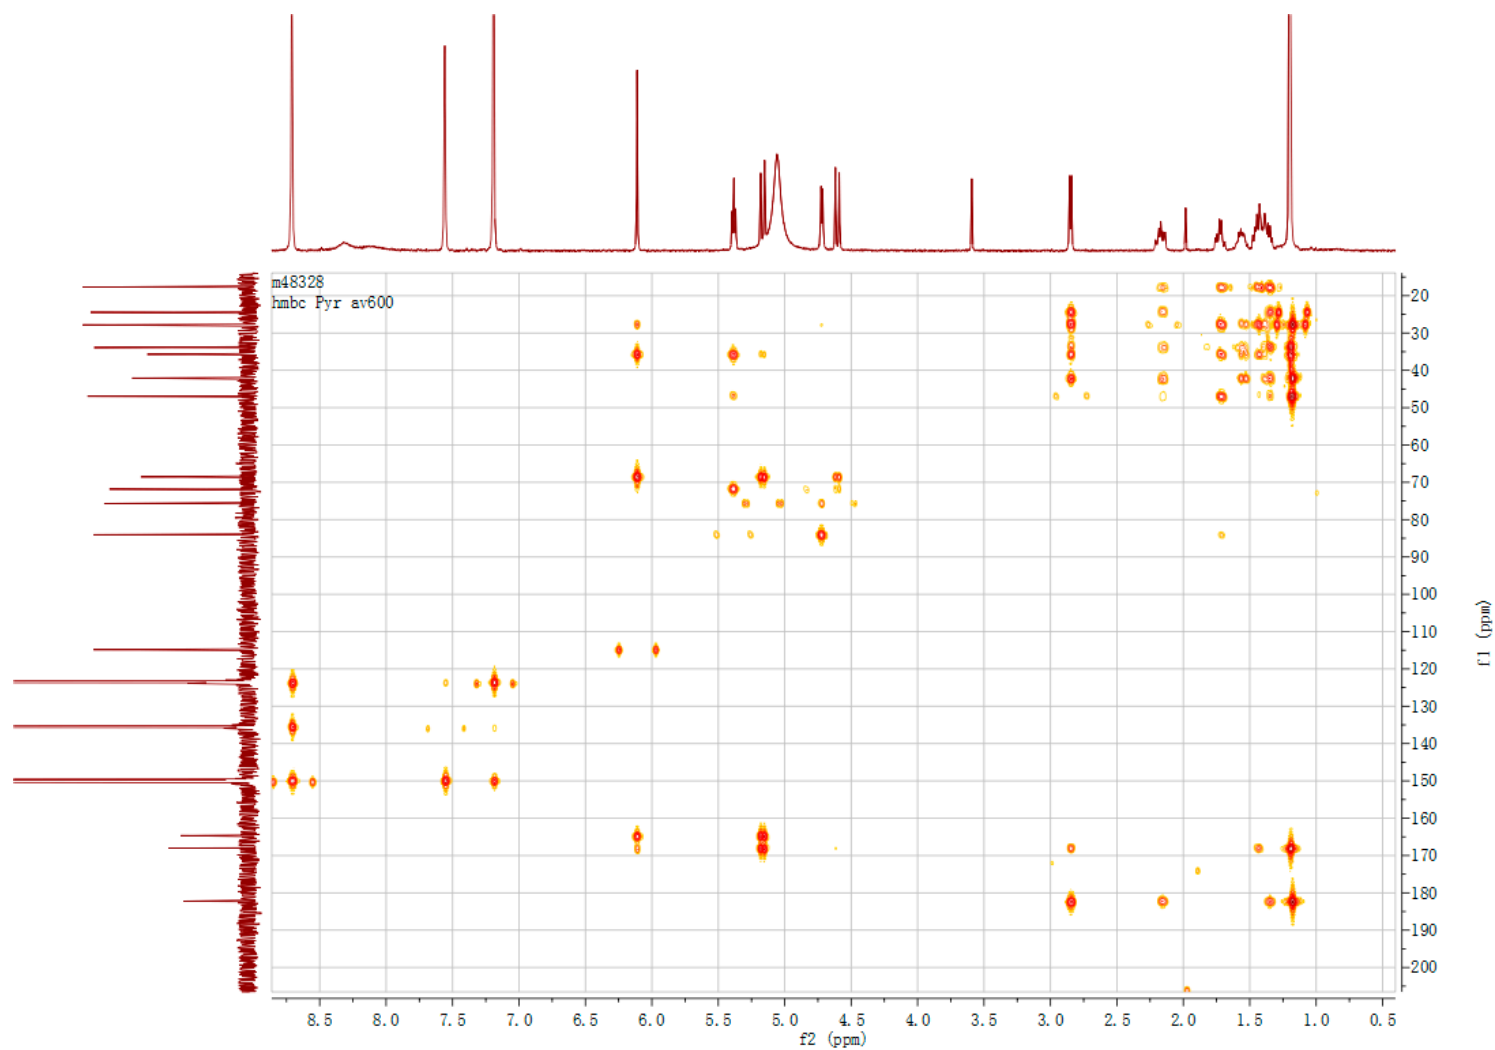

**Figure S10.** The HMBC NMR of botryosphaerin H in  $C_5D_5N$ .

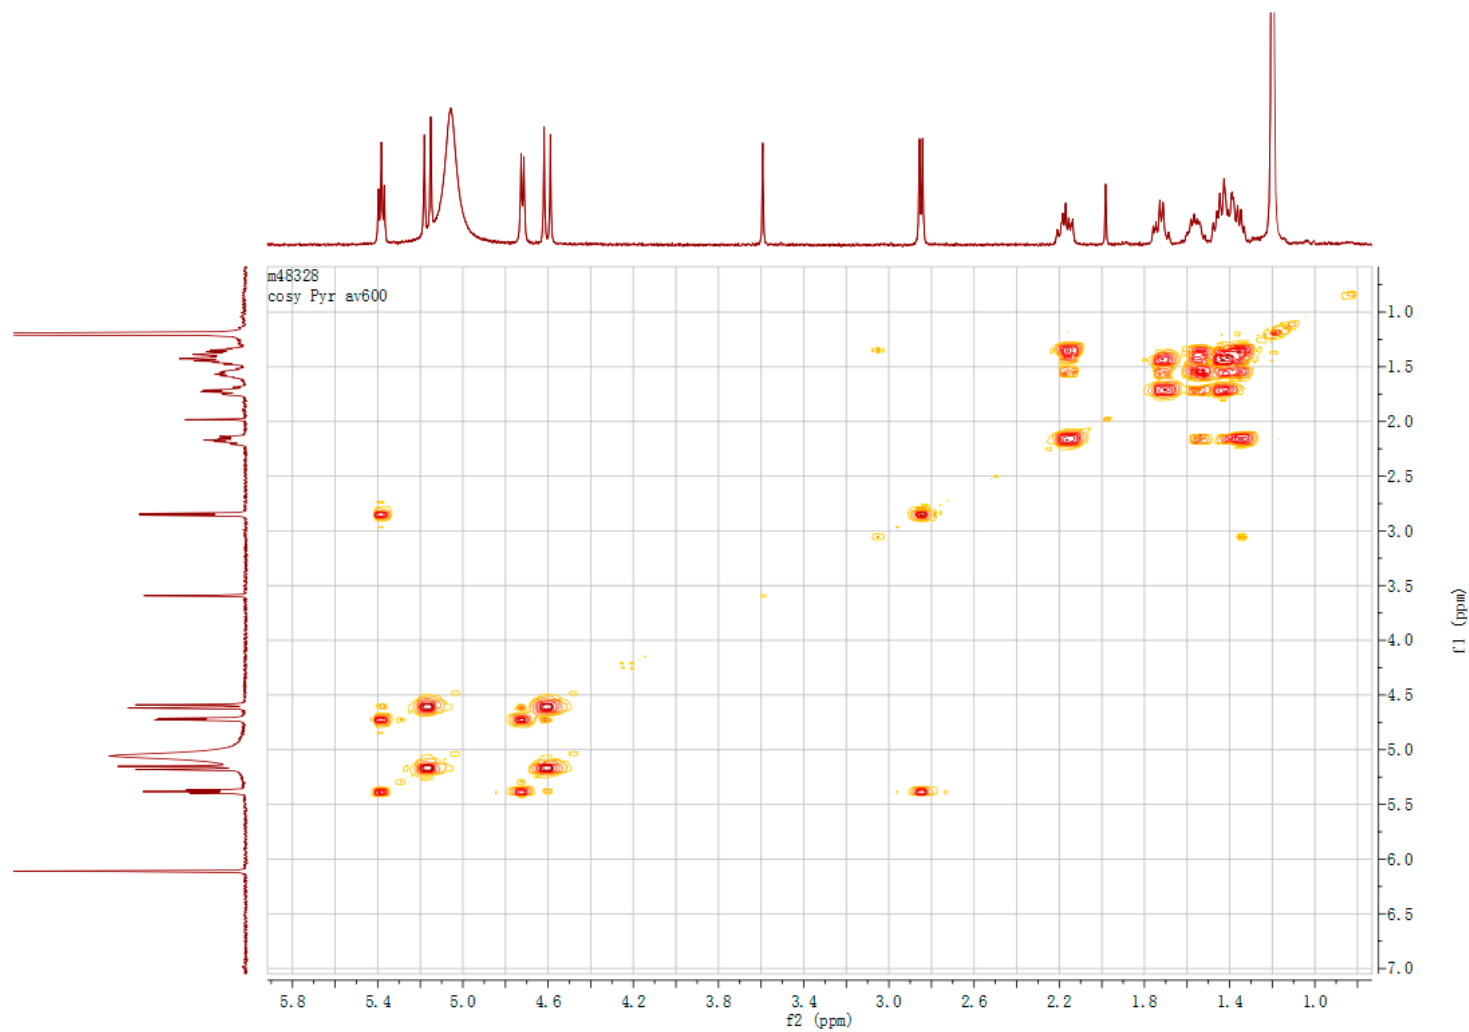

**Figure S11.** The COSY NMR of botryosphaerin H in  $C_5D_5N$ .

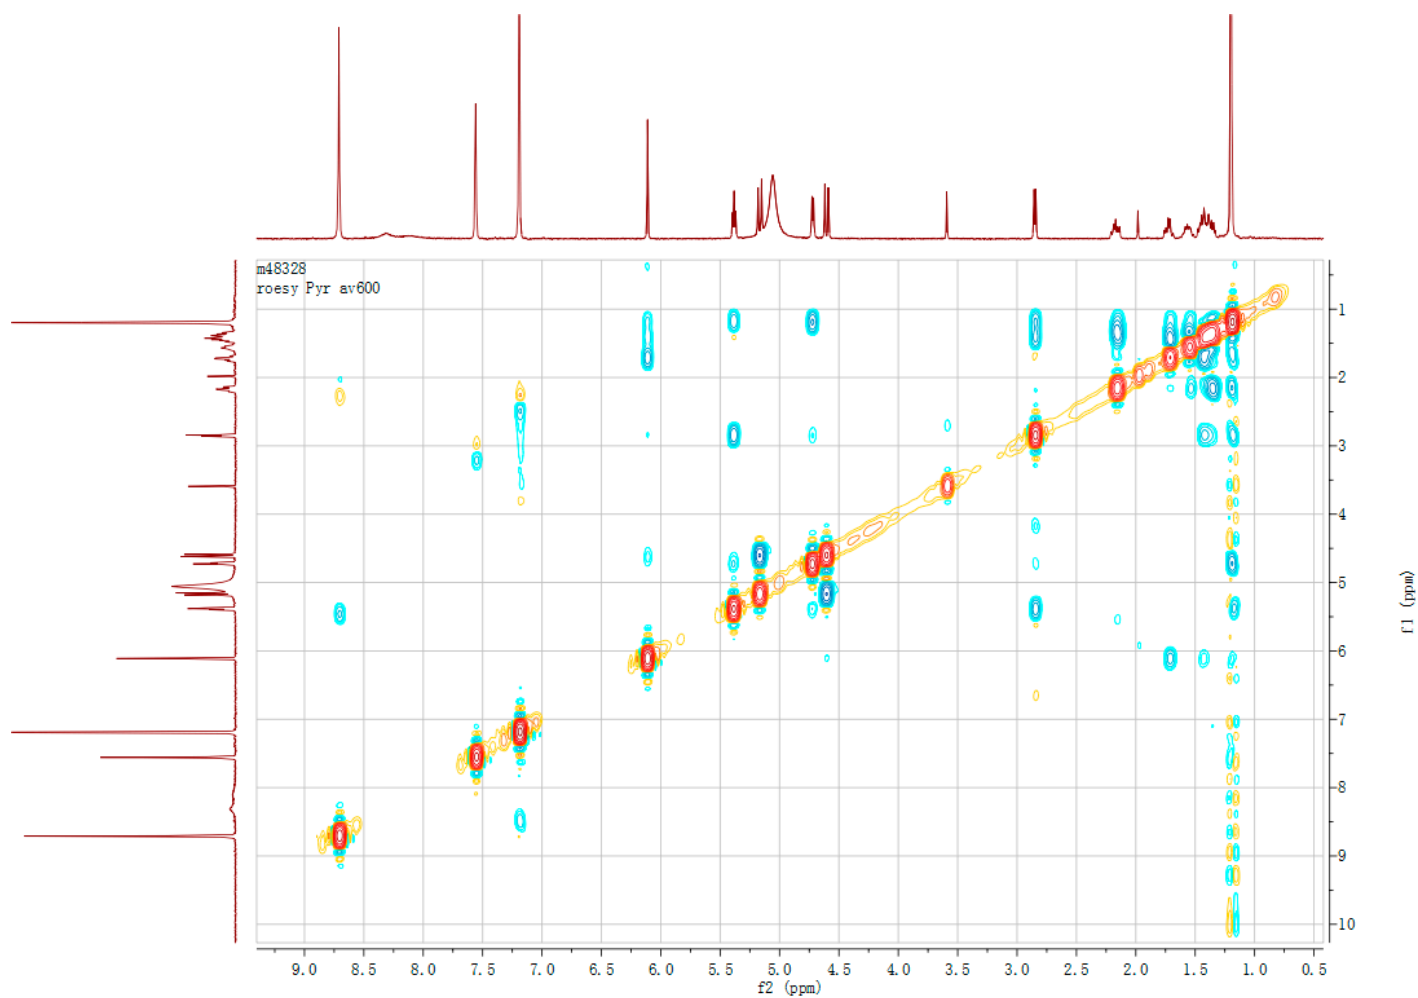

**Figure S12.** The ROESY NMR of botryosphaerin H in  $C_5D_5N$ .
